# Supplementary material for: Improvements and inter-laboratory implementation and optimization of blood-based single-locus age prediction models using DNA methylation of the ELOVL2 promoter
Source: PubMed Central journal article supplement (PMC7515898; doi:10.1038/s41598-020-72567-6), 2020-09-24
Supplement: 41598_2020_72567_MOESM1_ESM.pdf [file 41598_2020_72567_MOESM1_ESM.pdf]

## Supplementary Information for:

# Improvements and inter-laboratory implementation and optimization of blood-based single-locus age prediction models using DNA methylation of the *ELOVL2* promoter

Imène Garali<sup>1,2\*</sup>, Mourad Sahbatou<sup>3\*</sup>, Antoine Daunay<sup>4</sup>, Laura G. Baudrin<sup>2,4</sup>, Victor Renault<sup>1</sup>, Yosra Bouyacoub<sup>2,4</sup>, Jean-François Deleuze<sup>1-5</sup> & Alexandre How-Kit<sup>3†</sup>

<sup>1</sup> Laboratory for Bioinformatics, Foundation Jean Dausset – CEPH, Paris, France

<sup>2</sup> Laboratory of Excellence GenMed, Paris, France

<sup>3</sup> Laboratory for Human Genetics, Foundation Jean Dausset – CEPH, Paris, France

<sup>4</sup> Laboratory for Genomics, Foundation Jean Dausset – CEPH, Paris, France

<sup>5</sup> Centre National de Recherche en Génomique Humaine, CEA, Institut François Jacob, Evry, France

\* Both authors contributed equally to this work.

† *Correspondence to:*

Alexandre How-Kit, Ph.D., Laboratory for Genomics, Foundation Jean Dausset - CEPH, Paris, F-75010, France,

Tel.: +33-(0)1- 53725146, email: [alexandre.how-kit@fjd-ceph.org](mailto:alexandre.how-kit@fjd-ceph.org)

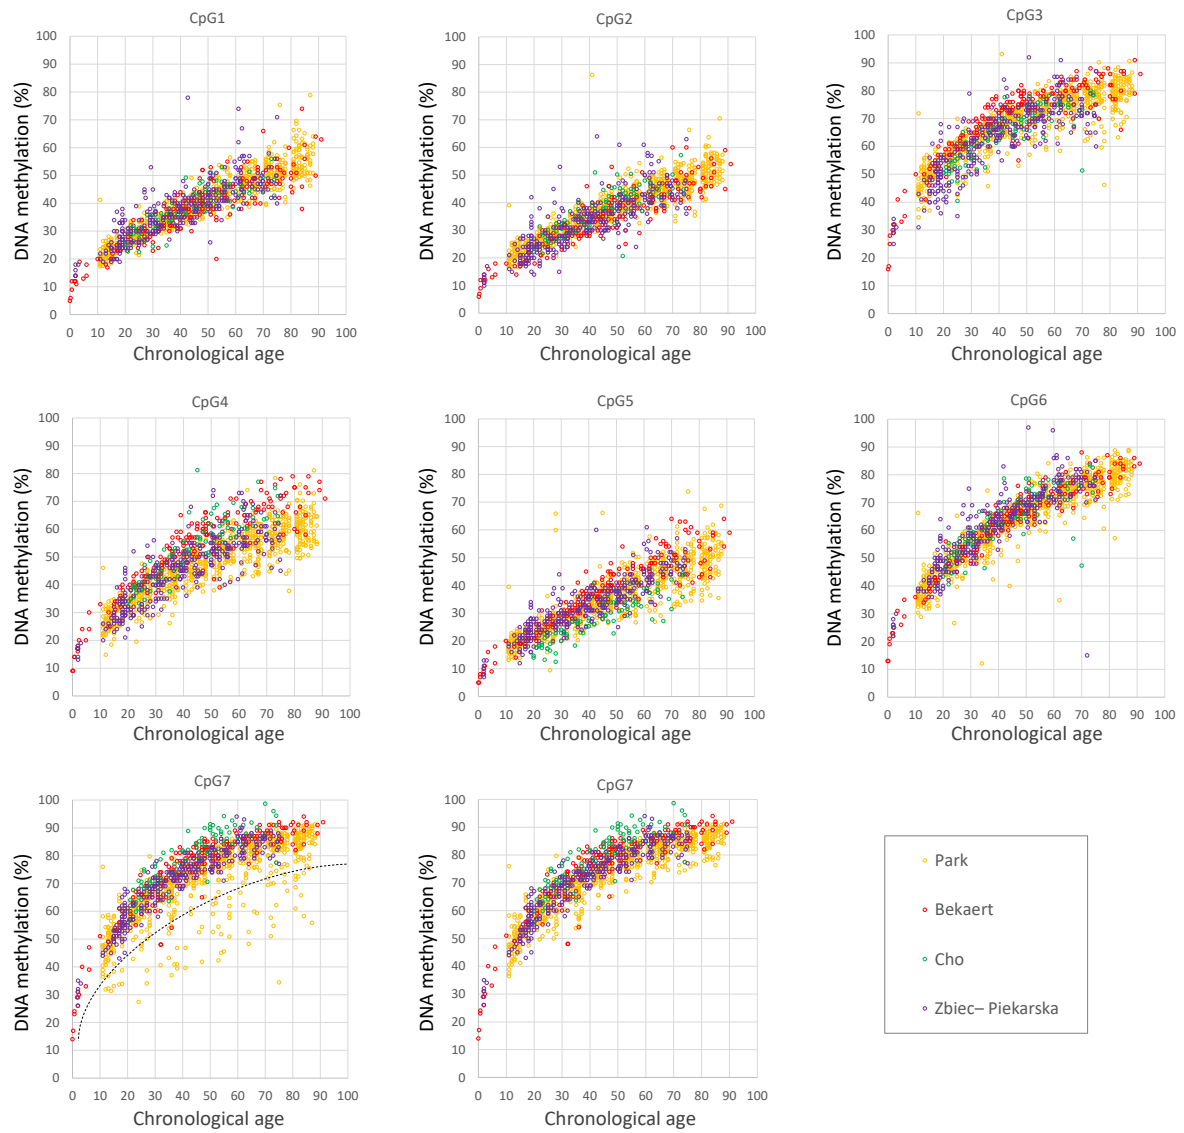

**Supplementary Figure 1.** Variation of the DNA methylation of the 7 CpGs located in the *ELOVL2* promoter in the blood samples from the four previously published studies.

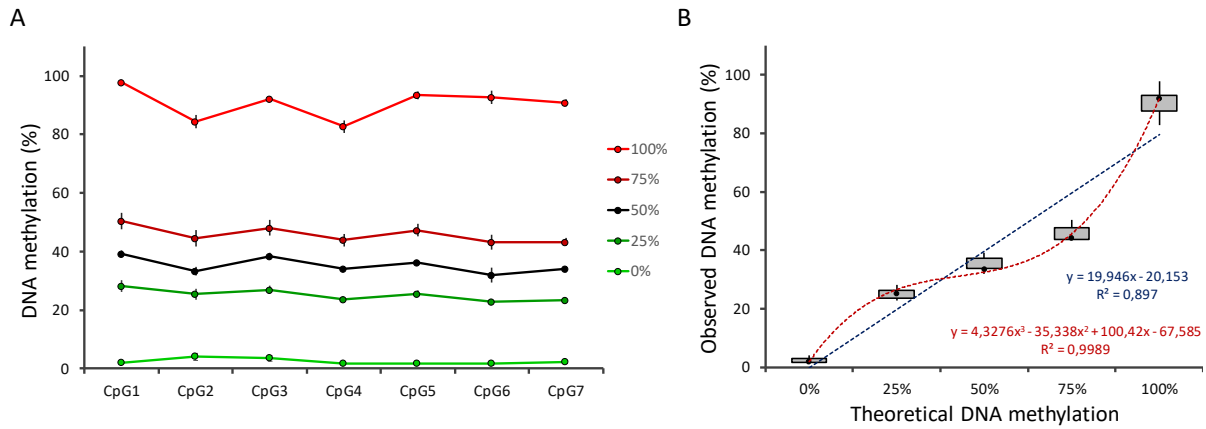

**Supplementary Figure 2.** *ELOVL2* DNA methylation pyrosequencing assay linearity assessment. **A.** DNA methylation patterns of the 7 analyzed CpGs in *ELOVL2* promoter using 0%, 25%, 50%, 75% and 100% DNA methylation standards (the 0% and 100% DNA methylation standards were purchased from Qiagen and mixed in 3:1, 1:1 and 1:3 equimolar ratios to obtain 25%, 50% and 75% DNA methylation standards). **B.** Boxplot of the expected and obtained DNA methylation values for the 7 analyzed CpGs in the *ELOVL2* promoter. The linear and polynomial regression curves and their corresponding equations and coefficients of determination  $R^2$  are indicated. Experiments were performed in triplicate and vertical bars in the line graphs represent standard deviation.

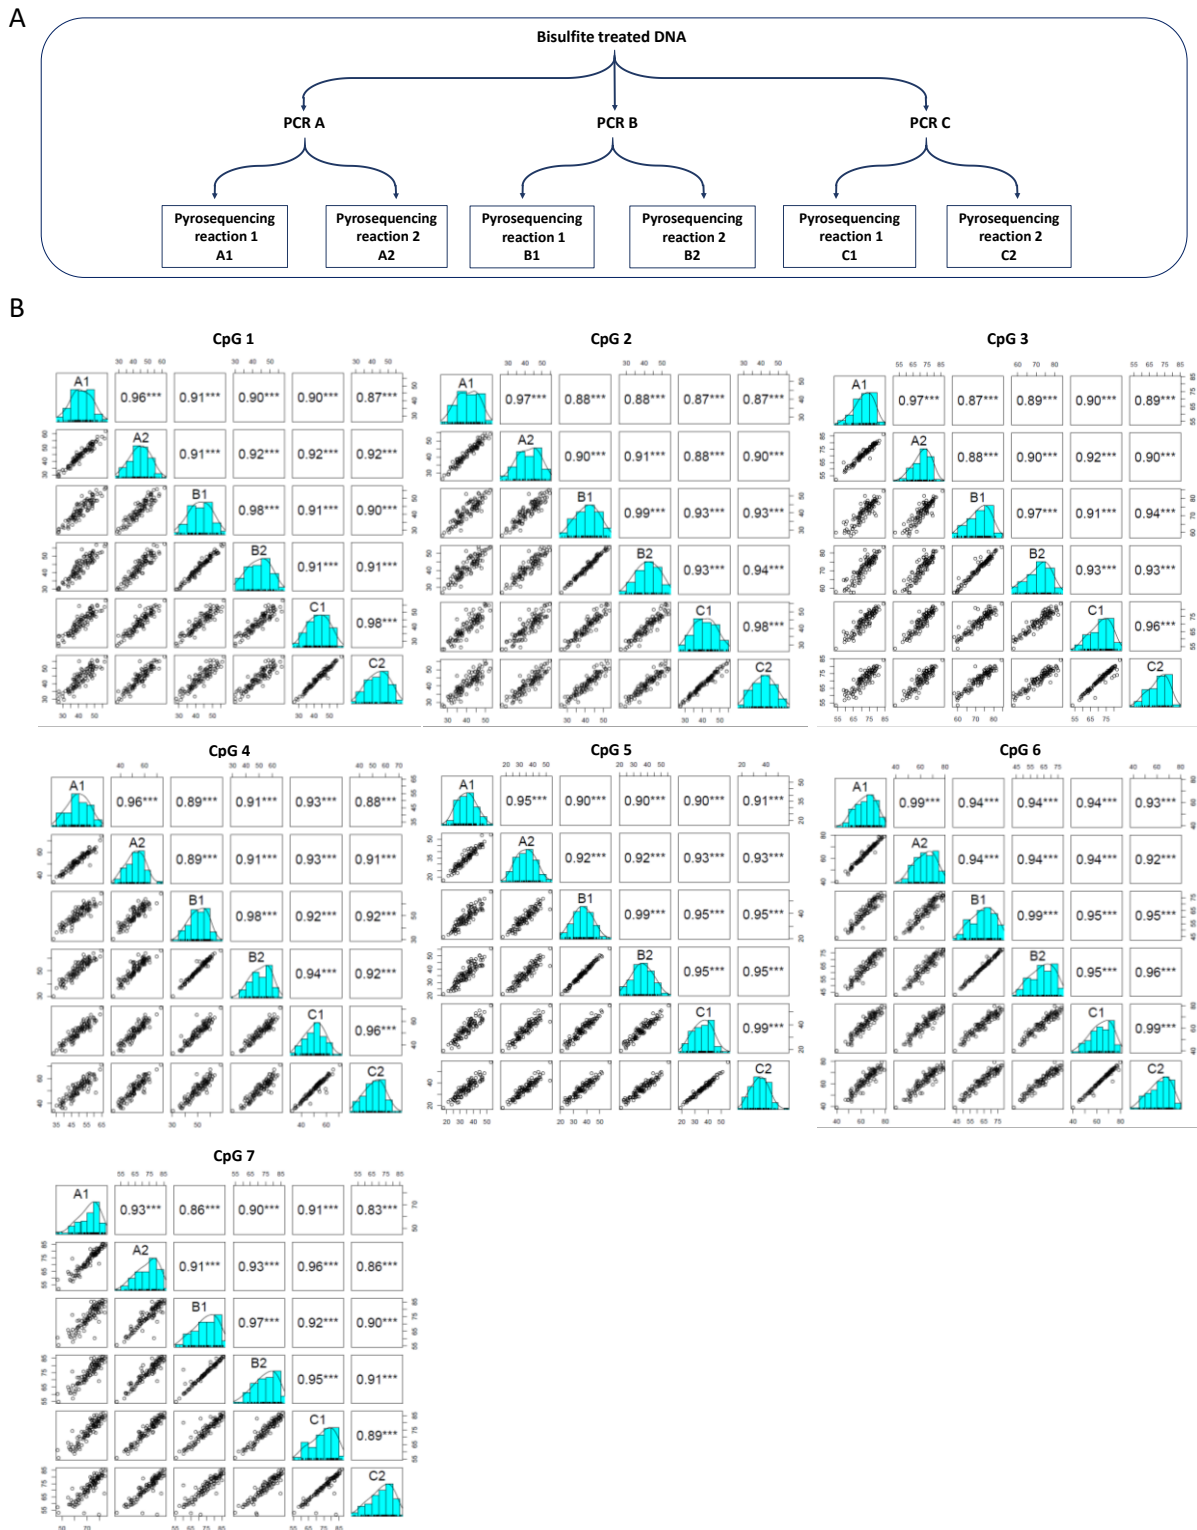

**Supplementary figure 3.** Effect of PCR and pyrosequencing replicate experiments on *ELOVL2* promoter DNA methylation of the independent testing set (100 samples). **A.** Description of the experimental workflow. **B.** Correlation plots of DNA methylation values of each CpG obtained between every PCR and pyrosequencing replicate. The Pearson R coefficients and scatterplots between two replicates (A1, A2, B1, B2, C1 and C2) are given for each CpG. \*\*\* indicates p-value < 0.001 for the correlation tests.

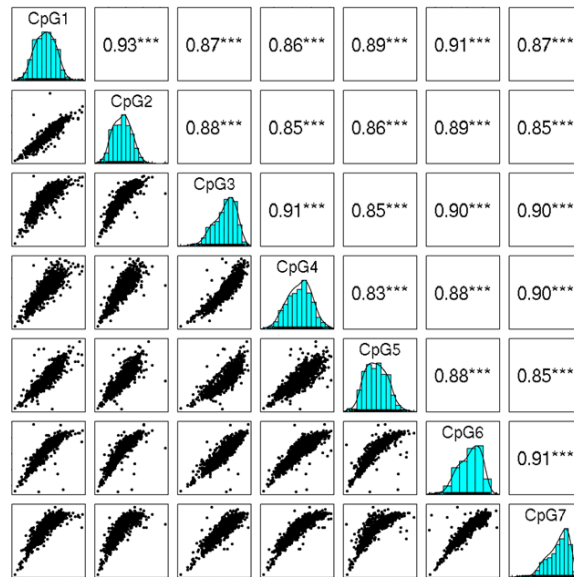

**Supplementary Figure 4.** Correlation matrix of DNA methylation of the seven CpGs from the *ELOVL2* promoter used in our study using the training set. \*\*\* indicates  $p$ -value < 0.001

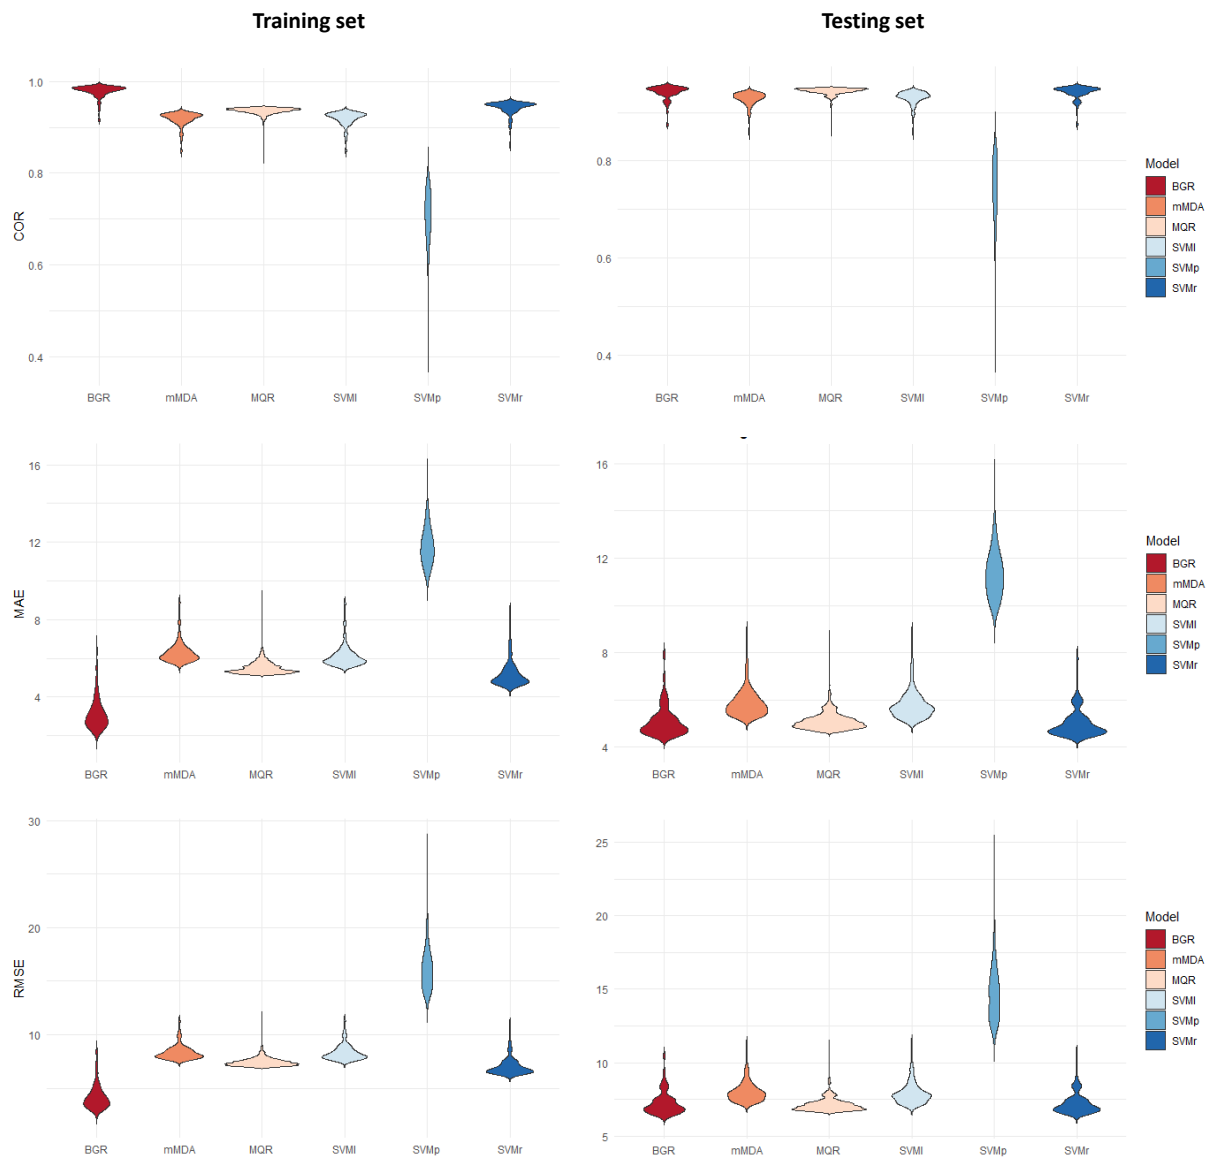

**Supplementary Figure 5.** Violin plots showing the distribution of Pearson correlation coefficients (CORR), mean absolute deviations (MAD) and root mean square errors (RMSE) obtained with the training and testing sets for the 17 018 age prediction models based on DNA methylation of the *ELOVL2* promoter. For each indicator, the values were grouped according to the statistical approach used.

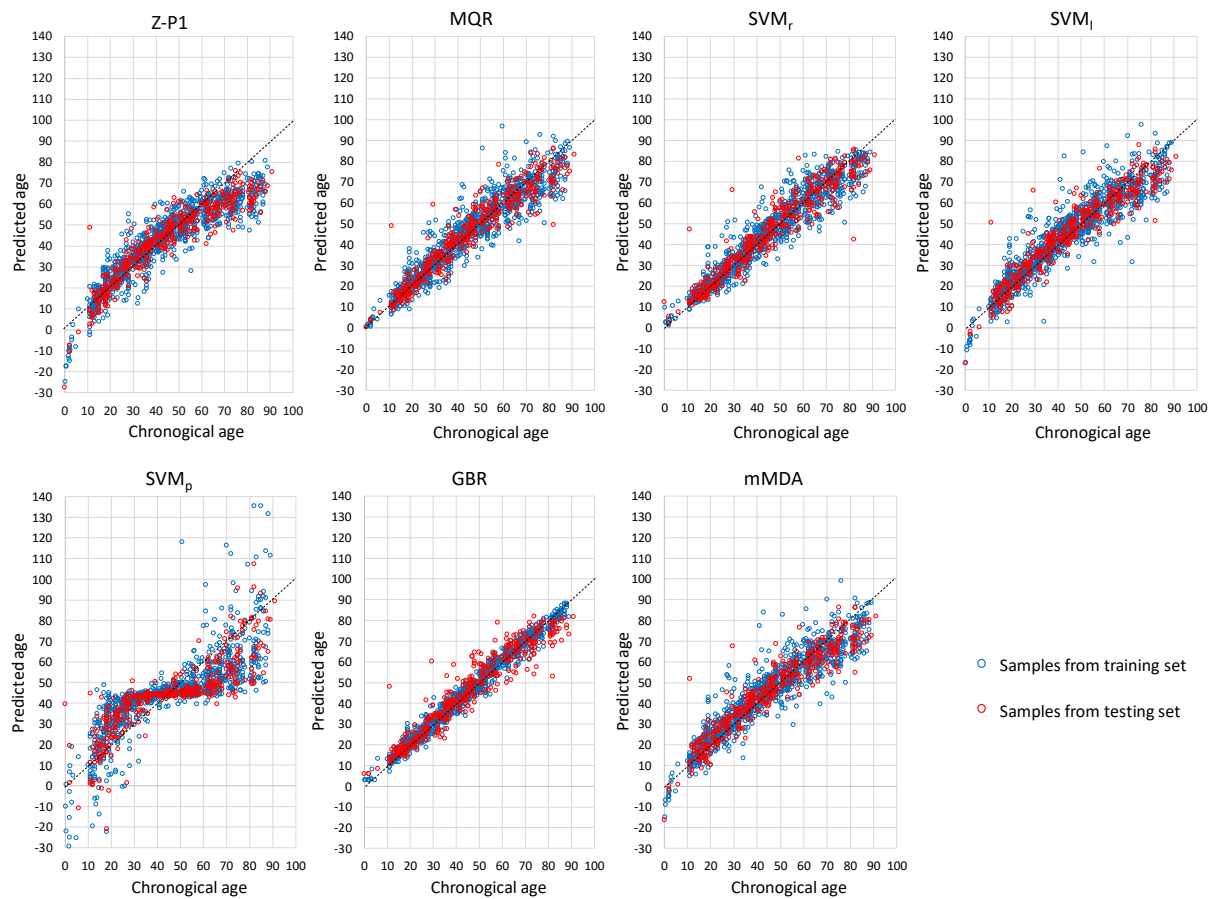

**Supplementary Figure 6.** Scatterplots of predicted age and chronological age of the training and testing samples obtained with *ELOVL2* age-prediction models based on seven different statistical approaches. The plotted data were obtained from the combination of CpGs giving the best age prediction accuracy on the testing set. Z-P1, Zbiiec-Piekarska model <sup>1</sup> using multiple linear regression; MQR, multiple quadratic regression; SVM, support vector machine with radial kernel (<sub>r</sub>), linear (<sub>l</sub>) and polynomial (<sub>p</sub>) functions; GBR, gradient boosting regressor; mMDA, missMDA. Four out-of-scale values (y-axis) are missing for SVM<sub>p</sub>.

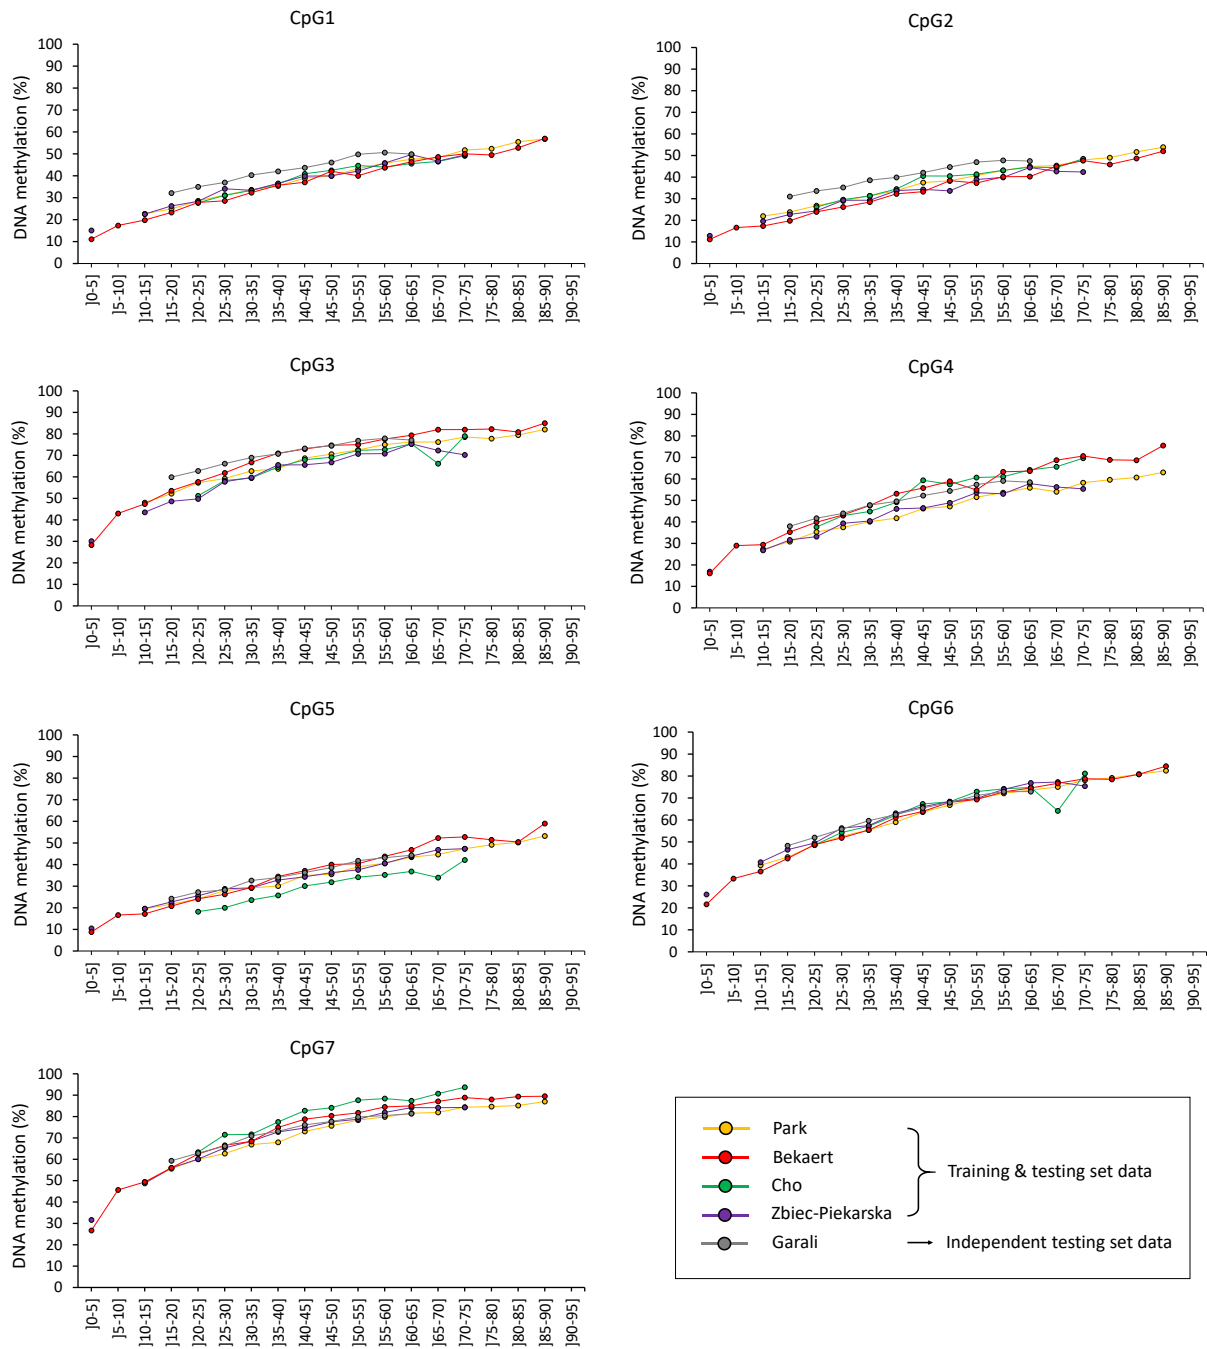

**Supplementary Figure 7.** Average DNA methylation of the 7 CpGs located in the *ELOVL2* promoter from the blood samples of the four previously published studies (Park <sup>2</sup>, Bekaert <sup>3</sup>, Cho <sup>4</sup> and Zbiec-Piekarska <sup>5</sup>) and our independent testing set according to age groups in 5 year increments. At least 2 individuals are present in each age group.



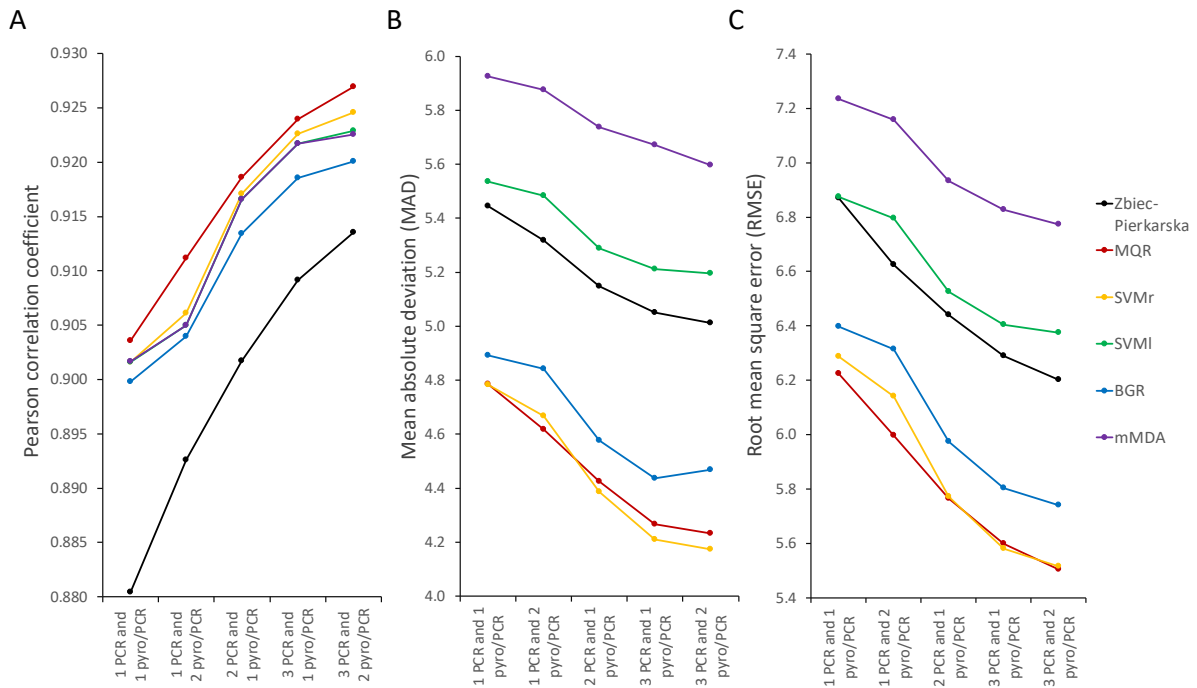

**Supplementary Figure 8.** Effect of PCR and/or pyrosequencing replicate experiments on age prediction performances in an independent testing set of 100 blood samples. For each tested statistical model, the Pearson R correlation coefficient (A), the mean absolute deviation (B) and the root-mean-square error (C) of the predicted and chronological ages are shown according to the increased number of PCR and/or pyrosequencing replicates. The estimators are given for the combinations of CpGs giving the best age prediction performances (see Table 3).

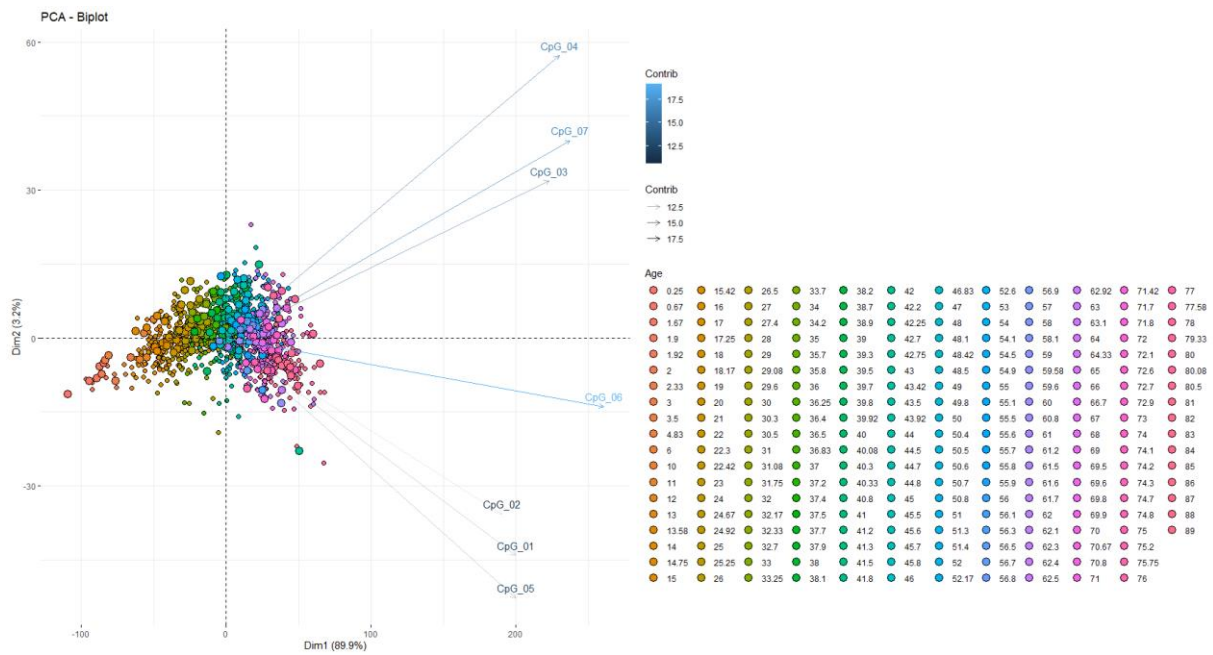

**Supplementary Figure 9.** Principal component analysis (PCA) biplot of the first two principal component coefficients, observations and observed variables using the training dataset (1028 individuals). The PCA biplot shows both PC scores of samples (dots) and loadings of variables (vectors). The further away these vectors are from a PC origin, the more influence they have on that PC. Loading plots also hint at how variables correlate with one another.

**Supplementary Table 1.** Description of the samples and dataset used

| Study                        | Blood Samples <sup>a</sup> |           | Training Set <sup>b</sup> |           | Testing Set (I) <sup>b</sup> |           | Independent Testing Set (II) <sup>c</sup> |           |
|------------------------------|----------------------------|-----------|---------------------------|-----------|------------------------------|-----------|-------------------------------------------|-----------|
|                              | N                          | Age range | N                         | Age range | N                            | Age range | N                                         | Age range |
| Bekaert <sup>3</sup>         | 206                        | 0-91      | 150                       | 0-89      | 56                           | 0-75      | -                                         | -         |
| Zbiac-Piekarska <sup>5</sup> | 420                        | 2-75      | 299                       | 2-75      | 121                          | 2-75      | -                                         | -         |
| Park <sup>2</sup>            | 765                        | 11-90     | 507                       | 11-88     | 185                          | 11-88     | -                                         | -         |
| Cho <sup>4</sup>             | 100                        | 20-74     | 72                        | 20-74     | 23                           | 22-74     | -                                         | -         |
| Daunay <sup>6</sup> & Garali | -                          | -         | -                         | -         | -                            | -         | 100                                       | 19-65     |
| Total                        | 1491                       | 0-91      | 1028                      | 0-91      | 385                          | 0-88      | 100                                       | 19-65     |

<sup>a</sup> The total number of samples from the original studies are indicated, regardless of the original training/testing sets.

<sup>b</sup> New training and testing sets used in our study and randomly generated.

<sup>c</sup> Independent validation set from the same samples analyzed in <sup>6</sup> but totally reprocessed in our study.

**Supplementary Table 2.** List of PCR and pyrosequencing primers used in the different studies

| Study                        | Forward PCR Primer          | Reverse PCR Primer              | Pyrosequencing Primer    | Sequence to Analyse                                                                                                                                                        |
|------------------------------|-----------------------------|---------------------------------|--------------------------|----------------------------------------------------------------------------------------------------------------------------------------------------------------------------|
| Zbiec-Piekarska et al., 2015 | Biotin-GGGGAGTAGGGTAAGTGAGG | AACAAAACCATTTCCCCTAATAT         | ACAACCAATAAATATTCCTAAAAC | CCR <sub>1</sub> TGAAACR <sub>2</sub> TTGAAGACCR <sub>3</sub> CCR <sub>4</sub> CR <sub>5</sub> CR <sub>6</sub> AAACCR <sub>7</sub> AC                                      |
| Bekaert et al., 2015         | Biotin-AGGGGYGTAGGGTAAGTGAG | AAACCCAACATAAAACAAACCAA         | AATAAATATTCCTAAAAC       | R <sub>1</sub> TAAACR <sub>2</sub> TTAAACCR <sub>3</sub> CCR <sub>4</sub> CR <sub>5</sub> CR <sub>6</sub> AAACCR <sub>7</sub> ACR <sub>8</sub> CCR <sub>9</sub> ACTAAACCTA |
| Park et al., 2016            | Biotin-GGGGAGTAGGGTAAGTGAGG | AACAAAACCATTTCCCCTAATAT         | ACAACCAATAAATATTCCTAAAAC | CCR <sub>1</sub> TGAAACR <sub>2</sub> TTGAAGACCR <sub>3</sub> CCR <sub>4</sub> CR <sub>5</sub> CR <sub>6</sub> AAACCR <sub>7</sub> AC                                      |
| Cho et al., 2017             | AGGGGAGTAGGGTAAGTGAGG       | Biotin-AACCATTCCCCTAATATATACTCA | GGGAGGAGATTTGTAGGTTT     | AGTYGGYGT <sub>7</sub> GGTTT <sub>6</sub> GY <sub>5</sub> GY <sub>4</sub> GGY <sub>3</sub> GGTTTAA <sub>2</sub> GTTTAY <sub>1</sub> GGA                                    |
| Garali et al., 2020          | Biotin-GGGGAGTAGGGTAAGTGAGG | AACAAAACCATTTCCCCTAATAT         | ACAACCAATAAATATTCCTAAAAC | CCR <sub>1</sub> TGAAACR <sub>2</sub> TTGAAGACCR <sub>3</sub> CCR <sub>4</sub> CR <sub>5</sub> CR <sub>6</sub> AAACCR <sub>7</sub> AC                                      |

**Supplementary Table 3.** Comparison of linear, quadratic and exponential regressions of the chronological age of the training set on the DNA methylation of each CpG in the *ELOVL2* promoter.

| CpG | Chromosome location (GRCh38) | Linear         |          |                |              |               | Quadratic      |          |                |              |               | Exponential    |         |                |              |              |
|-----|------------------------------|----------------|----------|----------------|--------------|---------------|----------------|----------|----------------|--------------|---------------|----------------|---------|----------------|--------------|--------------|
|     |                              | R <sup>2</sup> | p-value  | Corr. Coeff. R | MAD          | RMSE          | R <sup>2</sup> | p-value  | Corr. Coeff. R | MAD          | RMSE          | R <sup>2</sup> | p-value | Corr. Coeff. R | MAD          | RMSE         |
| 1   | Chr6: 11,044,661             | <b>0.821</b>   | <2,2e-16 | <b>0.900</b>   | <b>6.806</b> | <b>9.425</b>  | 0.766          | <2,2e-16 | 0.884          | 7.606        | 10.201        | n,a            | <2e-16  | 0.872          | 8.840        | 11.141       |
| 2   | Chr6: 11,044,655             | <b>0.774</b>   | <2,2e-16 | <b>0.897</b>   | <b>7.284</b> | <b>9.595</b>  | 0.707          | <2,2e-16 | 0.885          | 7.941        | 10.296        | n,a            | <2e-16  | 0.881          | 9.256        | 11.373       |
| 3   | Chr6: 11,044,647             | 0.724          | <2,2e-16 | 0.856          | 8.796        | 11.171        | <b>0.743</b>   | <2,2e-16 | <b>0.867</b>   | <b>8.207</b> | <b>10.748</b> | n,a            | <2e-16  | 0.861          | 8.353        | 11.033       |
| 4   | Chr6: 11,044,644             | <b>0.716</b>   | <2,2e-16 | <b>0.865</b>   | <b>8.379</b> | <b>10.891</b> | 0.680          | <2,2e-16 | 0.854          | 8.839        | 11.380        | n,a            | <2e-16  | 0.844          | 9.613        | 12.037       |
| 5   | Chr6: 11,044,642             | <b>0.781</b>   | <2,2e-16 | <b>0.918</b>   | <b>6.545</b> | <b>8.690</b>  | 0.723          | <2,2e-16 | 0.899          | 7.492        | 9.679         | n,a            | <2e-16  | 0.894          | 8.233        | 10.383       |
| 6   | Chr6: 11,044,640             | 0.820          | <2,2e-16 | 0.927          | 6.094        | 8.114         | <b>0.850</b>   | <2,2e-16 | <b>0.941</b>   | <b>5.141</b> | <b>7.315</b>  | n,a            | <2e-16  | 0.941          | 5.461        | 7.523        |
| 7   | Chr6: 11,044,634             | 0.764          | <2,2e-16 | 0.887          | 7.702        | 9.955         | 0.794          | <2,2e-16 | 0.907          | 6.821        | 9.085         | n,a            | <2e-16  | <b>0.910</b>   | <b>6.479</b> | <b>8.979</b> |

The estimators of the three types of regressions giving the best performances have been bolded.

**Supplementary Table 4.** Age prediction performances obtained for the testing set by averaging the ages predicted with the different statistical models tested.

| Methods Combinations <sup>1,2</sup> | R            | MAD          | RMSE         |
|-------------------------------------|--------------|--------------|--------------|
| GBR + SVMr + MQR                    | 0.955        | 4.364        | 6.363        |
| GBR + SVMr                          | 0.955        | 4.368        | 6.371        |
| GBR + MQR                           | 0.955        | 4.397        | 6.389        |
| <b>SVMr</b>                         | <b>0.953</b> | <b>4.410</b> | <b>6.492</b> |
| SVMr + MQR                          | 0.955        | 4.419        | 6.420        |
| <b>GBR</b>                          | <b>0.955</b> | <b>4.426</b> | <b>6.398</b> |
| GBR + SVMr + MQR                    | 0.955        | 4.446        | 6.426        |
| GBR + SVMr + SVMr                   | 0.954        | 4.452        | 6.439        |
| GBR + SVMr + mMDA + MQR             | 0.954        | 4.462        | 6.446        |
| GBR + SVMr + mMDA                   | 0.954        | 4.479        | 6.473        |
| GBR + SVMr + MQR                    | 0.954        | 4.531        | 6.480        |
| SVMr + SVMr + MQR                   | 0.953        | 4.547        | 6.512        |
| GBR + mMDA + MQR                    | 0.954        | 4.557        | 6.509        |
| GBR + SVMr + SVMr + mMDA + MQR      | 0.953        | 4.559        | 6.516        |
| SVMr + mMDA + MQR                   | 0.953        | 4.568        | 6.541        |
| <b>MQR</b>                          | <b>0.953</b> | <b>4.574</b> | <b>6.559</b> |
| GBR + SVMr                          | 0.953        | 4.582        | 6.523        |
| GBR + SVMr + SVMr + mMDA            | 0.953        | 4.595        | 6.560        |
| SVMr + SVMr                         | 0.952        | 4.611        | 6.585        |
| GBR + mMDA                          | 0.953        | 4.622        | 6.584        |
| SVMr + mMDA                         | 0.952        | 4.652        | 6.648        |
| GBR + SVMr + mMDA + MQR             | 0.952        | 4.664        | 6.598        |
| SVMr + SVMr + mMDA + MQR            | 0.952        | 4.679        | 6.626        |
| GBR + SVMr + mMDA                   | 0.951        | 4.751        | 6.693        |
| SVMr + MQR                          | 0.951        | 4.762        | 6.676        |
| SVMr + SVMr + mMDA                  | 0.950        | 4.779        | 6.739        |
| mMDA + MQR                          | 0.951        | 4.791        | 6.725        |
| SVMr + mMDA + MQR                   | 0.949        | 4.882        | 6.805        |
| <b>SVMr</b>                         | <b>0.945</b> | <b>5.130</b> | <b>7.058</b> |
| SVMr + mMDA                         | 0.944        | 5.167        | 7.119        |
| <b>mMDA</b>                         | <b>0.943</b> | <b>5.245</b> | <b>7.233</b> |

<sup>1</sup> for each statistical model, the ages were predicted using the combination of CpG giving the best age prediction performance according to the testing (V) set (see Table 2)

<sup>2</sup> age prediction performances of each statistical approach alone are indicated in bold.

**Supplementary Table 5.** Age prediction performances of the different statistical models on the independent testing set using the same CpG combinations as defined in Table 2.

| Model              | Best age-prediction performance from Training (T)/Testing (V) sets <sup>1</sup> | Number of CpGs | CpG combination                                                                                         | Independent Testing set (1 replicates: 1 PCR and 1 PSQ/PCR) |       |       |
|--------------------|---------------------------------------------------------------------------------|----------------|---------------------------------------------------------------------------------------------------------|-------------------------------------------------------------|-------|-------|
|                    |                                                                                 |                |                                                                                                         | R                                                           | MAD   | RMSE  |
| Zbiec-Pierkarska 1 | -                                                                               | 2              | CpG <sub>5,7</sub>                                                                                      | 0.880                                                       | 5.445 | 6.870 |
| MQR                | T                                                                               | 9              | CpG <sub>1-2 &amp; 4-6</sub> & CpG <sub>2<sup>2</sup>, 4<sup>2</sup>, 6<sup>2</sup>-7<sup>2</sup></sub> | 0.912                                                       | 6.602 | 7.712 |
|                    | V                                                                               | 8              | CpG <sub>4-6</sub> & CpG <sub>2<sup>2</sup>-4<sup>2</sup>, 6<sup>2</sup>-7<sup>2</sup></sub>            | 0.908                                                       | 5.667 | 6.901 |
| SVMr               | T                                                                               | 6              | CpG <sub>1-3, 5-7</sub>                                                                                 | 0.906                                                       | 6.666 | 7.950 |
|                    | V                                                                               | 5              | CpG <sub>2-3, 5-7</sub>                                                                                 | 0.901                                                       | 6.128 | 7.478 |
| SVMl               | T                                                                               | 7              | CpG <sub>1-7</sub>                                                                                      | 0.908                                                       | 7.911 | 9.041 |
|                    | V                                                                               | 5              | CpG <sub>2-6</sub>                                                                                      | 0.906                                                       | 7.406 | 8.581 |
| BGR                | T                                                                               | 7              | CpG <sub>1-7</sub>                                                                                      | 0.899                                                       | 6.727 | 7.864 |
|                    | V                                                                               | 5              | CpG <sub>2, 4-7</sub>                                                                                   | 0.898                                                       | 6.177 | 7.407 |
| mMDA               | T                                                                               | 3              | CpG <sub>1, 5-6</sub>                                                                                   | 0.905                                                       | 7.973 | 9.094 |
|                    | V                                                                               | 3              | CpG <sub>2, 5-6</sub>                                                                                   | 0.905                                                       | 8.172 | 9.308 |

<sup>1</sup> For each statistical model, both CpG combinations giving the best age prediction accuracy according to the training (T) and testing (V) sets were included in the table.

**Supplementary Table 6.** Age prediction performances obtained for the independent testing set by averaging the ages predicted with the different statistical models tested.

| Method combination <sup>1</sup> | 1 PCR and 1 PSQ/PCR<br>(1 replicate) |              |              | 3 PCR and 2 PSQ/PCR<br>(6 replicates) |              |              |
|---------------------------------|--------------------------------------|--------------|--------------|---------------------------------------|--------------|--------------|
|                                 | R                                    | MAD          | RMSE         | R                                     | MAD          | RMSE         |
| MQR + SVMr                      | 0.905                                | 4.717        | 6.189        | 0.927                                 | 4.156        | 5.461        |
| MQR + SVMr + GBR                | 0.904                                | 4.753        | 6.234        | 0.925                                 | 4.256        | 5.532        |
| <b>SVMr</b>                     | <b>0.902</b>                         | <b>4.784</b> | <b>6.287</b> | <b>0.925</b>                          | <b>4.174</b> | <b>5.515</b> |
| <b>MQR</b>                      | <b>0.904</b>                         | <b>4.786</b> | <b>6.225</b> | <b>0.927</b>                          | <b>4.232</b> | <b>5.504</b> |
| MQR + GBR                       | 0.903                                | 4.797        | 6.267        | 0.925                                 | 4.316        | 5.582        |
| SVMr + GBR                      | 0.902                                | 4.798        | 6.296        | 0.923                                 | 4.311        | 5.593        |
| MQR + SVMr + SVMl + GBR         | 0.905                                | 4.889        | 6.293        | 0.926                                 | 4.436        | 5.658        |
| <b>GBR</b>                      | <b>0.899</b>                         | <b>4.892</b> | <b>6.397</b> | <b>0.920</b>                          | <b>4.469</b> | <b>5.741</b> |
| MQR + SVMr + SVMl               | 0.906                                | 4.927        | 6.307        | 0.927                                 | 4.434        | 5.671        |
| MQR + SVMr + GBR + mMDA         | 0.905                                | 4.966        | 6.350        | 0.926                                 | 4.524        | 5.729        |
| SVMr + SVMl + GBR               | 0.905                                | 4.966        | 6.356        | 0.925                                 | 4.528        | 5.731        |
| MQR + SVMl + GBR                | 0.906                                | 4.971        | 6.346        | 0.926                                 | 4.539        | 5.756        |
| MQR + SVMr + mMDA               | 0.906                                | 5.030        | 6.386        | 0.927                                 | 4.556        | 5.771        |
| MQR + SVMr + SVMl + GBR + mMDA  | 0.906                                | 5.058        | 6.413        | 0.926                                 | 4.623        | 5.825        |
| SVMr + SVMl                     | 0.904                                | 5.062        | 6.429        | 0.926                                 | 4.573        | 5.794        |
| SVMr + GBR + mMDA               | 0.905                                | 5.067        | 6.434        | 0.925                                 | 4.644        | 5.829        |
| MQR + GBR + mMDA                | 0.906                                | 5.082        | 6.433        | 0.926                                 | 4.665        | 5.862        |
| MQR + SVMl                      | 0.906                                | 5.091        | 6.422        | 0.927                                 | 4.658        | 5.856        |
| SVMl + GBR                      | 0.905                                | 5.116        | 6.468        | 0.925                                 | 4.728        | 5.921        |
| MQR + SVMr + SVMl + mMDA        | 0.906                                | 5.134        | 6.475        | 0.927                                 | 4.698        | 5.896        |
| SVMr + SVMl + GBR + mMDA        | 0.905                                | 5.157        | 6.503        | 0.926                                 | 4.743        | 5.930        |
| MQR + SVMl + GBR + mMDA         | 0.906                                | 5.174        | 6.504        | 0.926                                 | 4.775        | 5.964        |
| SVMr + mMDA                     | 0.904                                | 5.212        | 6.557        | 0.926                                 | 4.766        | 5.954        |
| MQR + mMDA                      | 0.906                                | 5.262        | 6.568        | 0.927                                 | 4.859        | 6.034        |
| GBR + mMDA                      | 0.905                                | 5.295        | 6.612        | 0.925                                 | 4.920        | 6.095        |
| SVMr + SVMl + mMDA              | 0.904                                | 5.299        | 6.641        | 0.926                                 | 4.885        | 6.074        |
| MQR + SVMl + mMDA               | 0.905                                | 5.337        | 6.649        | 0.926                                 | 4.953        | 6.137        |
| SVMl + GBR + mMDA               | 0.905                                | 5.353        | 6.670        | 0.925                                 | 4.989        | 6.166        |
| <b>SVMl</b>                     | <b>0.902</b>                         | <b>5.536</b> | <b>6.874</b> | <b>0.923</b>                          | <b>5.197</b> | <b>6.375</b> |
| SVMl + mMDA                     | 0.902                                | 5.728        | 7.049        | 0.923                                 | 5.422        | 6.583        |
| <b>mMDA</b>                     | <b>0.902</b>                         | <b>5.936</b> | <b>7.240</b> | <b>0.923</b>                          | <b>5.654</b> | <b>6.806</b> |

<sup>1</sup> age prediction performances of each statistical approach alone are indicated in bold.



**Supplementary Table 7.** Detection of multicollinearity in the three MQR models presented in Tables 2 and 3.

| Regression equation <sup>1</sup>                                                                                                                                                                                                                                                                                                                                            | p-value   | Variance Inflation Factor (VIF) analysis |             |            |
|-----------------------------------------------------------------------------------------------------------------------------------------------------------------------------------------------------------------------------------------------------------------------------------------------------------------------------------------------------------------------------|-----------|------------------------------------------|-------------|------------|
|                                                                                                                                                                                                                                                                                                                                                                             |           | Variables                                | Tolerance   | VIF        |
| Predicted age = 0.960664 +<br>0.423366 x CpG <sub>1</sub> + 0.621481 x<br>CpG <sub>2</sub> + 0.22014 x CpG <sub>4</sub> + 0.275027<br>x CpG <sub>5</sub> - 1.098227 x CpG <sub>6</sub> -<br>0.006766 x CpG <sub>2</sub> <sup>2</sup> - 0.002802 x<br>CpG <sub>4</sub> <sup>2</sup> + 0.013366 x CpG <sub>6</sub> <sup>2</sup> +<br>0.002782 x CpG <sub>7</sub> <sup>2</sup> | < 2.2e-16 | 1 CpG <sub>1</sub>                       | 0.092740254 | 10.782804  |
|                                                                                                                                                                                                                                                                                                                                                                             |           | 2 CpG <sub>2</sub>                       | 0.012957728 | 77.174025  |
|                                                                                                                                                                                                                                                                                                                                                                             |           | 3 CpG <sub>4</sub>                       | 0.009571836 | 104.473169 |
|                                                                                                                                                                                                                                                                                                                                                                             |           | 4 CpG <sub>5</sub>                       | 0.162888166 | 6.139181   |
|                                                                                                                                                                                                                                                                                                                                                                             |           | 5 CpG <sub>6</sub>                       | 0.009365895 | 106.770364 |
|                                                                                                                                                                                                                                                                                                                                                                             |           | 6 CpG <sub>2</sub> <sup>2</sup>          | 0.01799795  | 55.561883  |
|                                                                                                                                                                                                                                                                                                                                                                             |           | 7 CpG <sub>4</sub> <sup>2</sup>          | 0.012631093 | 79.169715  |
|                                                                                                                                                                                                                                                                                                                                                                             |           | 8 CpG <sub>6</sub> <sup>2</sup>          | 0.009072519 | 110.222973 |
|                                                                                                                                                                                                                                                                                                                                                                             |           | 9 CpG <sub>7</sub> <sup>2</sup>          | 0.102189798 | 9.785713   |
| Predicted age = 2.6012533 +<br>0.5762165 x CpG <sub>4</sub> + 0.3983775 x<br>CpG <sub>5</sub> - 0.9083127 x CpG <sub>6</sub> +<br>0.00235 x CpG <sub>2</sub> <sup>2</sup> - 0.0002596 x<br>CpG <sub>3</sub> <sup>2</sup> - 0.0057862 x CpG <sub>4</sub> <sup>2</sup> +<br>0.0126432 x CpG <sub>6</sub> <sup>2</sup> + 0.0032594 x<br>CpG <sub>7</sub> <sup>2</sup>          | < 2.2e-16 | 1 CpG <sub>4</sub>                       | 0.009778364 | 102.266595 |
|                                                                                                                                                                                                                                                                                                                                                                             |           | 2 CpG <sub>5</sub>                       | 0.17607202  | 5.679494   |
|                                                                                                                                                                                                                                                                                                                                                                             |           | 3 CpG <sub>6</sub>                       | 0.010169183 | 98.336313  |
|                                                                                                                                                                                                                                                                                                                                                                             |           | 4 CpG <sub>2</sub> <sup>2</sup>          | 0.196257787 | 5.095339   |
|                                                                                                                                                                                                                                                                                                                                                                             |           | 5 CpG <sub>3</sub> <sup>2</sup>          | 0.107450535 | 9.306608   |
|                                                                                                                                                                                                                                                                                                                                                                             |           | 6 CpG <sub>4</sub> <sup>2</sup>          | 0.013652849 | 73.244786  |
|                                                                                                                                                                                                                                                                                                                                                                             |           | 7 CpG <sub>6</sub> <sup>2</sup>          | 0.009591711 | 104.256689 |
|                                                                                                                                                                                                                                                                                                                                                                             |           | 8 CpG <sub>7</sub> <sup>2</sup>          | 0.104977366 | 9.525863   |
| Predicted age = 13.4944951 -<br>0.8224263 x CpG <sub>6</sub> - 0.0001978 x<br>CpG <sub>4</sub> <sup>2</sup> + 0.0143482 x CpG <sub>6</sub> <sup>2</sup> +<br>0.0044380 x CpG <sub>7</sub> <sup>2</sup>                                                                                                                                                                      | < 2.2e-16 | 1 CpG <sub>6</sub>                       | 0.01931145  | 51.782739  |
|                                                                                                                                                                                                                                                                                                                                                                             |           | 2 CpG <sub>4</sub> <sup>2</sup>          | 0.20245162  | 4.939452   |
|                                                                                                                                                                                                                                                                                                                                                                             |           | 3 CpG <sub>6</sub> <sup>2</sup>          | 0.01943566  | 51.451811  |
|                                                                                                                                                                                                                                                                                                                                                                             |           | 4 CpG <sub>7</sub> <sup>2</sup>          | 0.12580673  | 7.9487     |

<sup>1</sup> The equations use DNA methylation values expressed in percentage.

## References

- 1 Zbiec-Piekarska, R. *et al.* Examination of DNA methylation status of the ELOVL2 marker may be useful for human age prediction in forensic science. *Forensic Sci Int Genet* 14, 161-167, doi:10.1016/j.fsigen.2014.10.002 (2015).
- 2 Park, J. L. *et al.* Identification and evaluation of age-correlated DNA methylation markers for forensic use. *Forensic Sci Int Genet* 23, 64-70, doi:10.1016/j.fsigen.2016.03.005 (2016).
- 3 Bekaert, B., Kamalandua, A., Zapico, S. C., Van de Voorde, W. & Decorte, R. Improved age determination of blood and teeth samples using a selected set of DNA methylation markers. *Epigenetics* 10, 922-930, doi:10.1080/15592294.2015.1080413 (2015).
- 4 Cho, S. *et al.* Independent validation of DNA-based approaches for age prediction in blood. *Forensic Sci Int Genet* 29, 250-256, doi:10.1016/j.fsigen.2017.04.020 (2017).
- 5 Zbiec-Piekarska, R. *et al.* Development of a forensically useful age prediction method based on DNA methylation analysis. *Forensic Sci Int Genet* 17, 173-179, doi:10.1016/j.fsigen.2015.05.001 (2015).
- 6 Daunay, A., Baudrin, L. G., Deleuze, J. F. & How-Kit, A. Evaluation of six blood-based age prediction models using DNA methylation analysis by pyrosequencing. *Sci Rep* 9, 8862, doi:10.1038/s41598-019-45197-w (2019).
